# Supplementary material
Source: PubMed Central journal article supplement (PMC6790789)
Supplement: rspb20191584supp1.pdf [file rspb20191584supp1.pdf]

Proceedings of the Royal Society B

## **Supplementary information for**

**Capture from the wild has long-term costs on reproductive success in Asian elephants**

doi: 10.1098/rspb.2019.1584

Mirkka Lahdenperä\*, John Jackson\*, Win Htut and Virpi Lummaa

\*These authors contributed equally to this work.

Correspondence should be addressed to M.L. (email: [Mirkka.Lahdenpera@utu.fi](mailto:Mirkka.Lahdenpera@utu.fi)).

### **This file includes:**

Supplementary text. S1 Data selection, S2 Age-specific reproduction model selection – additional details

References for SI reference citations

Figs. S1 to S5

Tables S1 to S4

## 1 **S1. Data selection**

2

### 3 *Age-specific reproduction*

4 The demographic dataset of Myanmar timber elephants for age-specific analyses includes 2,685 females  
5 with known birth origin (captive-born vs. wild-caught) and survival information, which lived beyond the  
6 earliest age of reproduction, 5 years. Of these females, 1,323 were captive-born between 1942-2011 and  
7 1,362 were wild-caught, captured between 1951-2002 at estimated ages of 0-55 years (mean capture age  
8  $16.13 \pm 10.91$ ). Exact lifespan was known for 1,079 females. Elephants were born (or estimated to be born)  
9 between 1921-2011 and come from 11 out of 14 regional divisions in Myanmar: Ayeyarwaddy (N = 39),  
10 Bago (N = 314), Chin (N = 31), Kachin (N = 266), Magway (N = 104), Mandalay (N = 401), Rakhine (N  
11 = 91), Sagaing (N = 928), Shan (N = 242), Tanintharyi (N = 6), Yangon (N = 8) and unknown (N = 255).  
12 In these analyses, we grouped regions together based on proximity and elevation, where conditions for  
13 elephants were more similar: Ayeyarwaddy, Tanintharyi, Bago, Rakhine and Yangon were grouped  
14 together, Chin and Shan were grouped together, and Magway and Mandalay were grouped together.  
15 Accounting for spatial variation in reproduction in our analyses was important because MTE elephants  
16 from different regions experience differences in forest cover, habitat availability and climatic conditions,  
17 which may influence survival and reproduction. Furthermore, grouping regional divisions based on  
18 elevation and proximity made sample sizes in each region group more comparable for analyses.  
19 Approximately 95% of the original demographic data was retained with reliable birth, capture, departure  
20 and death information.

21

### 22 *Calf survival and mother's birth origin*

23 To investigate whether captive-born and wild-caught females show differences in calf survival before age  
24 5, we analyzed 2423 calves (F = 1,235, M = 1,188; 1,290 born to captive-born females and 1,133 born to  
25 wild-caught females) born between 1960 and 2016 to 1030 mothers (500 captive-born and 530 wild-caught  
26 mothers). Generally, age-specific mortality in this population is greatest within the first 5 years [1], and

27 therefore we concentrated on this age range in the analysis. We excluded stillborn calves, calves born to  
28 mothers captured before 1952, twins, and calves with mistakes or missing information (on sex, maternal  
29 presence, or exact/censored lifespan). These calves come from 11 regions in Myanmar: Ayeyarwaddy (N  
30 = 59), Bago (N = 282), Chin (N = 4) Kachin (N = 130), Magway (N = 344), Mandalay (N = 255), Rakhine  
31 (N = 29), Sagaing (N = 956), Shan (N = 196), Taninthary (N = 7), Yangon (N = 9) and unknown (N = 152).  
32 In the analyses, regions were grouped in the same way as in age-specific reproduction analyses above  
33 resulting in 6 grouped regions.

34  
35 Calf age was included as a linear and quadratic term to control for the quadratic age effect on calf mortality  
36 before age 5 [1]. Birth cohorts and regions were also controlled for in the model (grouped the same way as  
37 in age-specific reproduction analyses, see SI). Maternal death is known to increase calf mortality [2], and  
38 maternal presence was therefore coded as a time-dependent variable in every year from birth to calf age 5  
39 (0 = mother died during the focal year/had died during previous years; 1 = mother was alive during the  
40 focal year). We also included an interaction term between calf age and maternal presence to control for the  
41 changing effect of maternal death on calf mortality at different calf ages [2]. Maternal age at the birth of  
42 the calf was included in the model, which ranged from 7-63 years old in the current sample. Maternal ages  
43 above 60 were grouped together because of small sample sizes (N = 6 calves). Short previous birth intervals  
44 are known to increase calf mortality [1], and we categorized birth intervals as short, medium, long, and  
45 firstborn categories based on the 25% and 75% quartiles of birth-interval length (3.84 and 7.44 years,  
46 respectively; average =  $6.28 \pm 3.75$  years). Birth order was not included because of its collinearity with  
47 maternal age and birth interval. We also controlled for the differences in survival between male and female  
48 calves [1], and an increased effect of maternal death on male calves by including calf sex and an interaction  
49 between maternal presence and calf sex in the model [2]. Finally, the mother's individual identification  
50 number was included as an intercept-only random effect to account for repeated births by the same female  
51 (ranges of 1-8 calves for wild-caught mothers and 1-10 calves for captive-born mothers; average = 2.35  
52 calves).

53

## 54 **S2. Age-specific reproduction model selection – additional details**

55 The model selection was carried out in two phases. First, we explored the full set (21,089 models) of age  
56 term models with generalized linear models (GLMs) with binomial error structures, incorporating all fixed  
57 effects, but excluding the random effects terms. Then, we re-ran the best 100 models using GLMMs, to  
58 incorporate the random effects terms of individual ID number and regional division group. We used this  
59 approach to reduce the computational power needed to assess all models, while maintaining a large enough  
60 subset of models incorporating the random effects. We compared the predictive performance of each model  
61 using the Akaike Information Criterion (AIC) [3]. The use of AIC was appropriate for the current study  
62 because each of the model parameters and interactions were considered *a priori* in the base model, and so  
63 all models contained the same number of parameters and interactions. The best ‘final’ model was the model  
64 with the lowest AIC value (Table S1). We assessed the significance of the terms in the best-fit model using  
65 likelihood ratio tests (LRTs) with the Chi-squared ( $\chi^2$ ) distribution. Where a model term was included as  
66 both a fixed effect and an interaction, all terms with that effect were removed in the LRT calculation.

67

68 The AIC value of the best model was 0.04 lower than the second explanatory model with three thresholds  
69 (different thresholds at 20 and 44, as opposed to 19 and 44 years of age; Table S2; Figure S1). This small  
70 difference is therefore consistent with a peak of reproduction of between 19 and 20. The difference between  
71 the best and twentieth explanatory models was 2.74, indicating clear support for the best model relative to  
72 other competitive models (Figure S1). The best-fit 20 three-threshold models are shown in Table S2. Of the  
73 best 100 models, all were three-threshold models, and we found little support for linear, quadratic or cubic  
74 age terms relative to threshold models.

75

76

## 77 **References**

78 1. Mar KU, Lahdenperä M, Lummaa V. 2012 Causes and correlates of calf mortality in captive asian

- 79 elephants (*Elephas maximus*). *PLoS One* **7**, 1–9. (doi:10.1371/journal.pone.0032335)
- 80 2. Lahdenperä M, Mar KU, Lummaa V. 2016 Short-term and delayed effects of mother death on calf  
81 mortality in Asian elephants. *Behav. Ecol.* **27**, 166–174. (doi:10.1093/beheco/arv136)
- 82 3. Burnham KP, Anderson DR. 2003 *Model selection and multimodel inference: a practical*  
83 *information-theoretic approach*. Springer. (doi:10.1016/j.ecolmodel.2003.11.004)
- 84
- 85
- 86
- 87
- 88
- 89
- 90
- 91

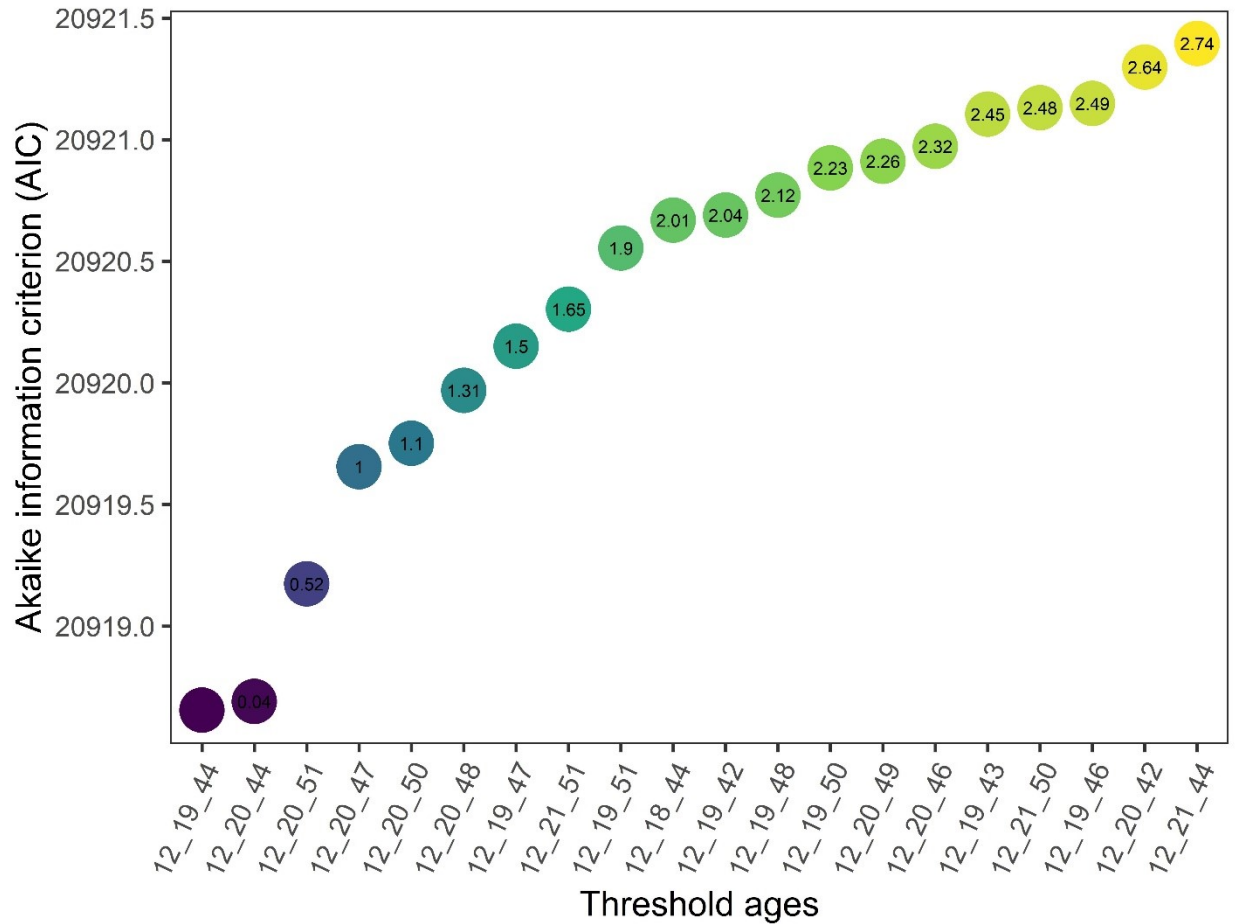

92  
 93 Figure S1. The best age-specific model was a three-threshold model with a peak reproductive age of 19.  
 94 Figure shows AIC scores and threshold ages for the best-fit 20 models incorporating age terms. Colour  
 95 denotes the AIC value, and the numbers within the points are the differences with respect to the best-fit  
 96 model. The AIC differences indicate small differences between the first- and second-best models, but clear  
 97 support for peak age of reproduction between 19 and 20.

98  
 99  
 100  
 101  
 102  
 103  
 104  
 105  
 106

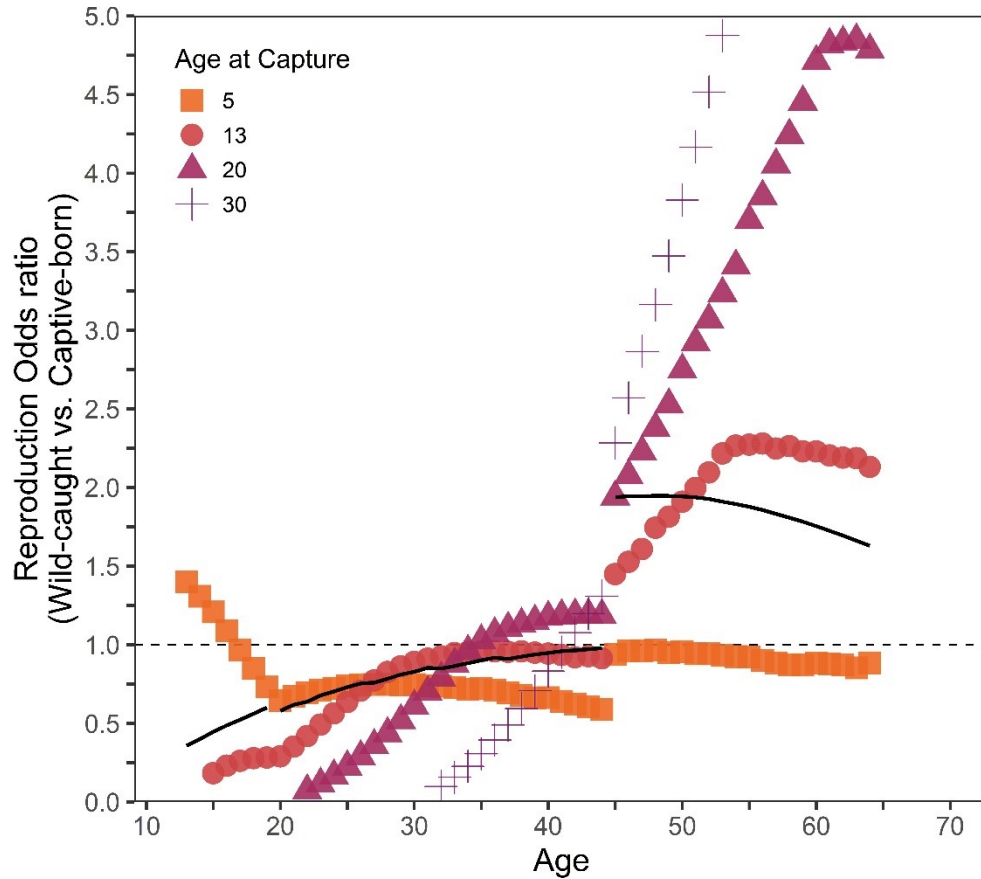

107

108 Figure S2. Wild-caught females had a greatly reduced odds of reproduction at peak reproductive ages (20-  
 109 44) and at the onset of reproduction (13-19). Furthermore, the decrease in reproductive rates immediately  
 110 after capture was the most pronounced in wild-caught females that were captured at older ages. Age-specific  
 111 reproduction odds ratios comparing wild-caught to captive-born, for all individuals (1323 captive-born  
 112 females and 1362 wild-caught females). Solid black line is the average age-specific odds ratio of  
 113 reproduction for wild-caught females relative to captive-born females, irrespective of capture age. Points  
 114 are examples of age-specific odds ratios for wild-caught females at different ages, where the colour and  
 115 shape denote predictions for specific capture ages (5,13,20,30). Dashed black line at odds 1 indicates an  
 116 equal odds for wild-caught and captive-born females.

117

118

119

120

121

122

123

124

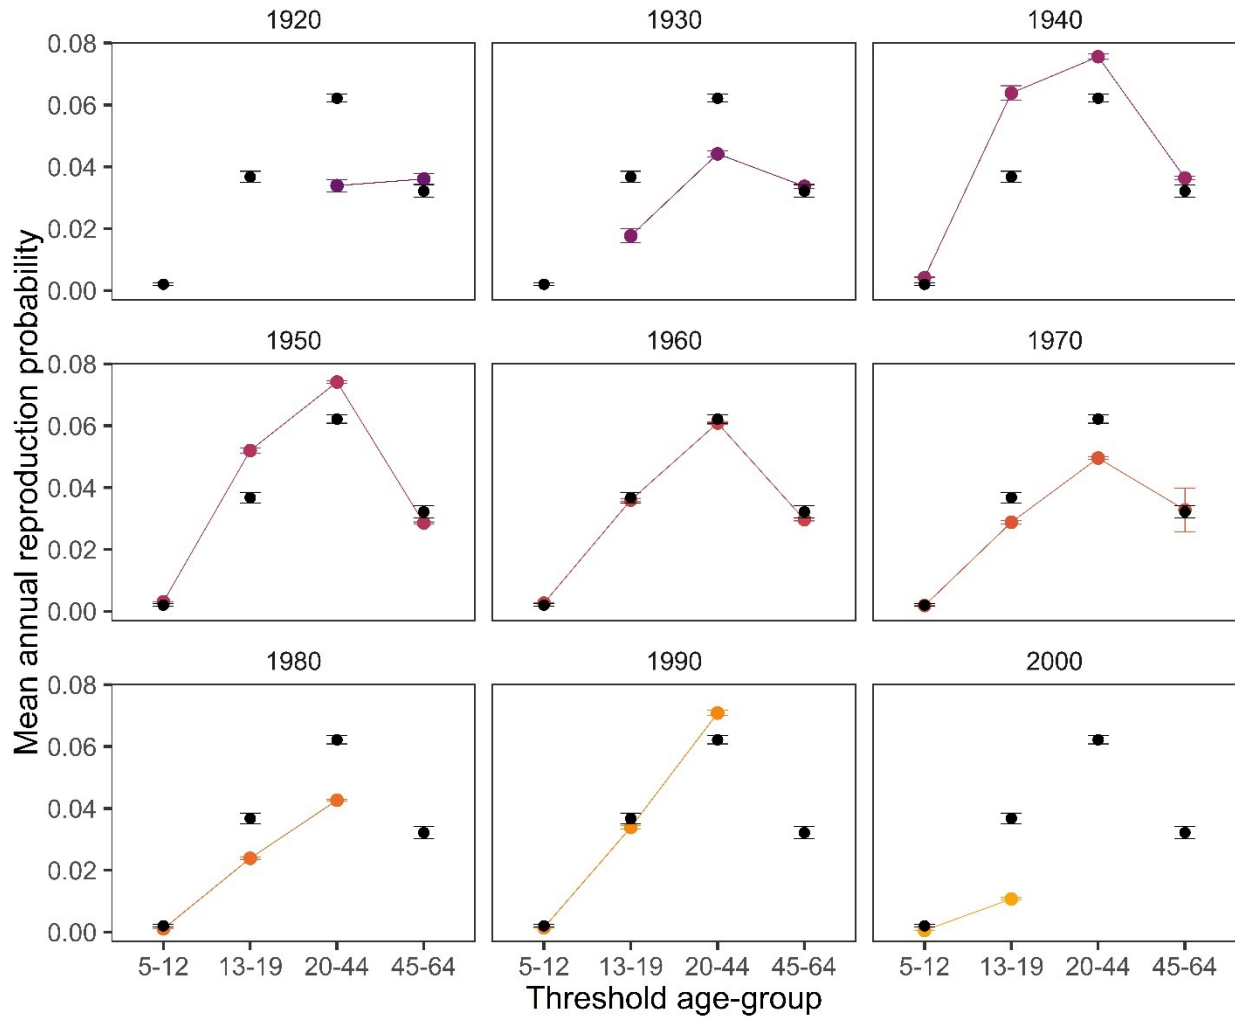

125

126 Figure S3. The age-specific birth rates from the 1960 birth cohort most adequately describe the mean  
 127 reproductive rates in the raw demographic data. Mean annual birth rate in each of the threshold age-groups  
 128 selected in the best-fit model for all females depending on the birth cohort (decade of birth). Coloured  
 129 points lines in each panel are the mean±SEM model predicted annual birth rate in each age-group for each  
 130 birth cohort (decade - panel titles). Black points denote the raw mean±SEM annual birth rate in each age-  
 131 group from demographic data. There was significant variation in age-specific reproduction depending on  
 132 birth cohort.

133

134

135

136

137

138

139



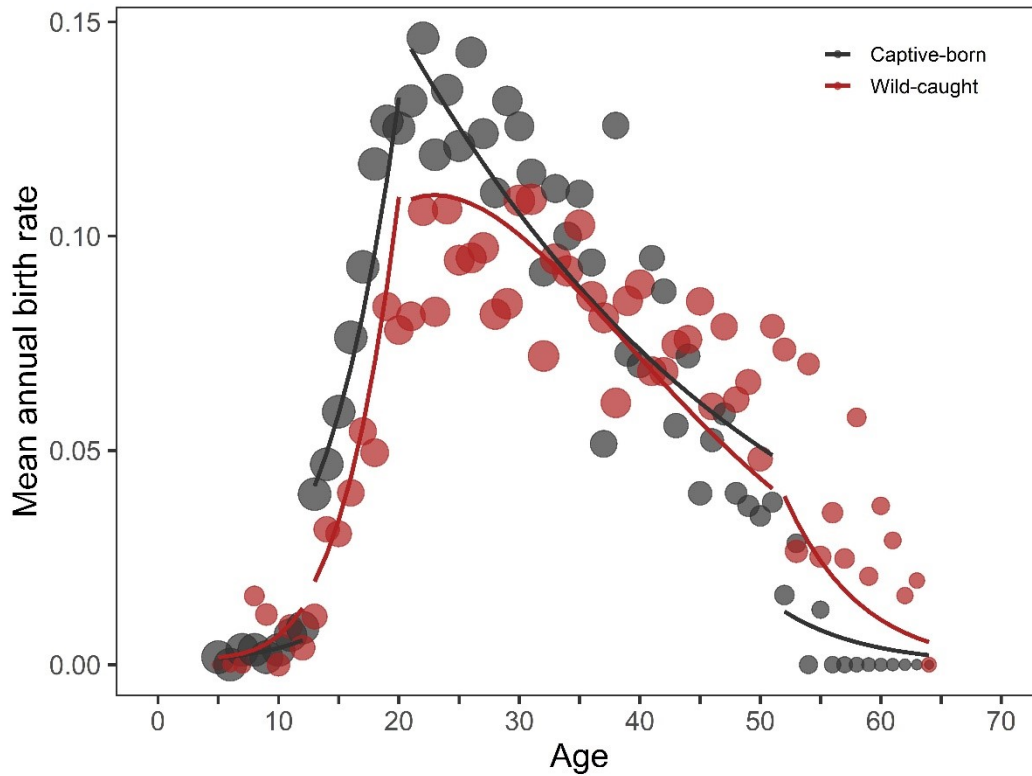

140

141 Figure S4. Wild-caught females that reproduced at least once had a reduced age-specific reproductive  
 142 probability compared to captive-born females. The figure shows age-specific patterns of reproduction for  
 143 captive-born and wild-caught females that reproduced at least once in their lifetime from the best-fit  
 144 threshold regression model (age groups: 5-12, 13-20, 21-51, 52-64). Points are the raw mean annual  
 145 predicted birth rates at each age for reproductive females only, with the size of the points denoting the  
 146 square root of the sample size at each age (range = 8-580 time-event data points). Lines are the mean  
 147 predicted values for an extended dataset of the observed females in the 1960 birth cohort, which were most  
 148 similar to raw mean birth rates.

149

150

151

152

153

154

155

156  
157  
158  
159  
160  
161  
162  
163  
164  
165  
166  
167  
168  
169  
170  
171  
172  
173  
174  
175  
176  
177  
178  
179  
180  
181  
182  
183  
184  
185  
186

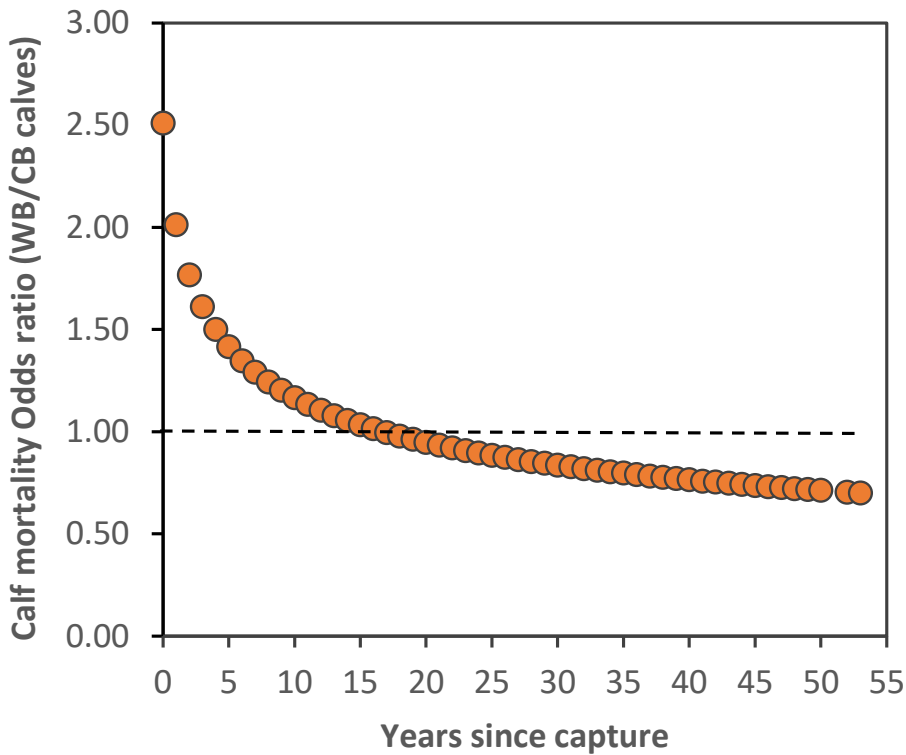

Figure S5. Calves of wild-caught (WB) mothers had increased mortality odds ratios (at each age from birth to age 5) compared to calves of captive-born (CB) mothers, the effect decreasing slowly and lasting ~16 years after mother's capture from wild (n=10,192 observations, 2423 calves, 1030 mothers). Points are yearly odds ratios after the mother's capture for calves born to wild-caught females relative to calves born to captive-born females. Dashed black line at odds 1 indicates an equal odds for calves of wild-caught mothers and calves of captive-born mothers.

187 **Table S1.** Parameter estimates and likelihood ratio tests (LRTs) for the effect of birth origin on lifetime  
 188 reproduction (a- binomial mixed effects model, n = 1678) and log-transformed age at first reproduction (b-  
 189 linear mixed effects model, n = 843) for female timber elephants. Estimates and standard errors presented  
 190 on the logit scale for table a). Colon (:) denotes an interaction terms.

| <b>a)</b>                   |                 |                       |                                |                |
|-----------------------------|-----------------|-----------------------|--------------------------------|----------------|
| <b>Fixed effect</b>         | <b>Estimate</b> | <b>Standard Error</b> | <b>LRT <math>\chi^2</math></b> | <b>p value</b> |
| Intercept                   | 0.02            | 1.19                  |                                |                |
| Birth origin                |                 |                       | 40.1                           | <0.001         |
| wild-caught                 | -0.37           | 0.22                  |                                |                |
| Censored                    |                 |                       | 15.1                           | <0.001         |
| dead (1)                    | 0.54            | 0.17                  |                                |                |
| Lifespan                    | 0.07            | 0.01                  | 93.1                           | <0.001         |
| Birth cohort                |                 |                       | 17.1                           | 0.02           |
| 1940                        | -1.93           | 1.11                  |                                |                |
| 1950                        | -1.99           | 1.11                  |                                |                |
| 1960                        | -2.34           | 1.12                  |                                |                |
| 1970                        | -2.56           | 1.12                  |                                |                |
| 1980                        | -2.53           | 1.13                  |                                |                |
| 1990                        | -2.17           | 1.15                  |                                |                |
| Birth origin:Age at capture |                 |                       | 4.9                            | 0.03           |
| wild-caught:age at capture  | -0.04           | 0.02                  |                                |                |
| <b>b)</b>                   |                 |                       |                                |                |
| Intercept                   | 2.67            | 0.08                  |                                |                |
| Birth origin                |                 |                       | 15.3                           | <0.001         |
| wild-caught                 | 0.08            | 0.02                  |                                |                |
| Censored                    |                 |                       | 0                              | 0.90           |
| dead (1)                    | 0.00            | 0.03                  |                                |                |
| Lifespan                    | 0.01            | 0.00                  | 17.3                           | <0.001         |
| Birth cohort                |                 |                       | 37.6                           | <0.001         |
| 1950                        | 0.09            | 0.05                  |                                |                |
| 1960                        | 0.12            | 0.05                  |                                |                |
| 1970                        | 0.16            | 0.05                  |                                |                |
| 1980                        | 0.30            | 0.06                  |                                |                |
| 1990                        | 0.14            | 0.07                  |                                |                |

191

192

193

194

195

196 Table S2. Model selection results for the incorporation of age terms via threshold regression. The best 20  
 197 models are shown based on the Akaike information criterion (AIC). All of the best models had three  
 198 thresholds, and thus four threshold age groups. The best model is highlighted in bold, and was selected in  
 199 both stages of model selection (GLM and GLMM models).

200

| Threshold age groups | Threshold ages    | AIC             | $\Delta$ AIC | GLM rank |
|----------------------|-------------------|-----------------|--------------|----------|
| <b>four</b>          | <b>12, 19, 44</b> | <b>20918.65</b> |              | <b>1</b> |
| four                 | 12, 20, 44        | 20918.69        | 0.04         | 2        |
| four                 | 12, 20, 51        | 20919.17        | 0.52         | 3        |
| four                 | 12, 20, 47        | 20919.66        | 1            | 4        |
| four                 | 12, 20, 50        | 20919.75        | 1.1          | 10       |
| four                 | 12, 20, 48        | 20919.97        | 1.31         | 7        |
| four                 | 12, 19, 47        | 20920.15        | 1.5          | 5        |
| four                 | 12, 21, 51        | 20920.3         | 1.65         | 14       |
| four                 | 12, 19, 51        | 20920.55        | 1.9          | 19       |
| four                 | 12, 18, 44        | 20920.67        | 2.01         | 8        |
| four                 | 12, 19, 42        | 20920.69        | 2.04         | 6        |
| four                 | 12, 19, 48        | 20920.77        | 2.12         | 17       |
| four                 | 12, 19, 50        | 20920.88        | 2.23         | 25       |
| four                 | 12, 20, 49        | 20920.91        | 2.26         | 18       |
| four                 | 12, 20, 46        | 20920.97        | 2.32         | 9        |
| four                 | 12, 19, 43        | 20921.11        | 2.45         | 13       |
| four                 | 12, 21, 50        | 20921.13        | 2.48         | 21       |
| four                 | 12, 19, 46        | 20921.15        | 2.49         | 16       |
| four                 | 12, 20, 42        | 20921.3         | 2.64         | 12       |
| four                 | 12, 21, 44        | 20921.4         | 2.74         | 11       |

201

202

203

204

205

206

207

208

209

210

211

212

213 **Table S3.** Parameter estimates from the best model of age-specific reproduction for only reproductive  
 214 females (n = 1175; 38,492 elephant-year observations), fit using binomial generalised linear mixed effects  
 215 models (GLMMs). Estimates and standard errors are present on the logit scale. The colon (:) depicts  
 216 interaction terms. LRT denotes likelihood ratio test statistics.

| <b>Fixed effects</b>               | <b>Estimate</b> | <b>Standard Error</b>     | <b>LRT <math>\chi^2</math></b> | <b>p value</b> |
|------------------------------------|-----------------|---------------------------|--------------------------------|----------------|
| Intercept                          | -5.28           | 1.05                      |                                |                |
| Age                                | 0.19            | 0.10                      | 309.0                          | <0.001         |
| Age group                          |                 |                           | 973.2                          | <0.001         |
| ages 13-20                         | 1.99            | 1.06                      |                                |                |
| ages 21-51                         | 6.51            | 1.01                      |                                |                |
| ages 52-64                         | 10.63           | 2.58                      |                                |                |
| Birth origin                       |                 |                           | 167.3                          | <0.001         |
| wild-caught                        | -2.24           | 0.55                      |                                |                |
| Lifespan                           | -0.09           | 0.01                      | 59.5                           | <0.001         |
| Average age                        | 0.15            | 0.02                      | 48.0                           | <0.001         |
| Birth cohort                       |                 |                           | 88.7                           | <0.001         |
| 1930                               | -0.96           | 0.26                      |                                |                |
| 1940                               | -1.06           | 0.25                      |                                |                |
| 1950                               | -1.42           | 0.26                      |                                |                |
| 1960                               | -1.61           | 0.27                      |                                |                |
| 1970                               | -1.76           | 0.28                      |                                |                |
| 1980                               | -1.97           | 0.29                      |                                |                |
| 1990                               | -1.61           | 0.30                      |                                |                |
| 2000                               | 1.67            | 1.16                      |                                |                |
| Censored                           |                 |                           | 9.53                           | <0.01          |
| dead (1)                           | -0.14           | 0.05                      |                                |                |
| Age:Age group                      |                 |                           | 142.1                          | <0.001         |
| age:ages 13-20                     | -0.01           | 0.11                      |                                |                |
| age:ages 21-51                     | -0.23           | 0.10                      |                                |                |
| age:ages 52-64                     | -0.34           | 0.11                      |                                |                |
| Age:Birth origin                   |                 |                           | 30.5                           | <0.001         |
| age:wild-caught                    | -0.06           | 0.01                      |                                |                |
| Age group:Birth Origin             |                 |                           | 28.5                           | <0.001         |
| ages 13-20:wild-caught             | -1.76           | 0.49                      |                                |                |
| ages 21-51:wild-caught             | -1.92           | 0.50                      |                                |                |
| ages 52-64:wild-caught             | -0.53           | 0.69                      |                                |                |
| Birth origin:ln time since capture |                 |                           | 96.4                           | <0.001         |
| wild-caught:ln time since capture  | 1.67            | 0.18                      |                                |                |
| <b>Random effects</b>              | <b>Variance</b> | <b>Standard deviation</b> |                                |                |
| Individual ID                      | 0.00            | 0.00                      |                                |                |
| Regional division group            | 0.004           | 0.06                      |                                |                |

217 **Table S4.** Discrete-time survival model of the effects mother's birth origin on offspring risk of death  
 218 during 0-4 (4.99) years in semi-captive timber elephants in Myanmar (Total n = 10,192 observations  
 219 (2,423 calves and 1030 mothers). Positive estimates reflect increasing mortality risk. Reference categories  
 220 are given in brackets. Mother's identity was fitted as a random term. The colon (:) depicts interaction  
 221 terms. CB= captive-born, time= years since mother's capture, prev. =previous, M=male, F=female.

| <b>Fixed effects</b>                   |                            | <b>Estimate</b> | <b>Std. Error</b> | <b>F value</b> | <b>Numdf, Dendf</b> | <b>P value</b> |
|----------------------------------------|----------------------------|-----------------|-------------------|----------------|---------------------|----------------|
| Intercept                              |                            | -3.4812         | 0.2627            |                |                     |                |
| Calf age                               |                            | -0.5587         | 0.1214            | 51.96          | 1,9183              | <0.0001        |
| Calf age:calf age                      |                            | 0.1549          | 0.02785           | 30.92          | 1,9183              | <0.0001        |
| Mother's Origin (CB)                   |                            | 0.9266          | 0.4079            | 5.16           | 1,9183              | 0.0231         |
| Mother's Origin:time (CB)              |                            | -0.3221         | 0.1355            | 5.65           | 1,9183              | 0.0175         |
| Prev. birth-interval (medium)          |                            |                 |                   | 3.54           | 3,9183              | 0.0141         |
|                                        | first-born                 | 0.4380          | 0.1754            |                |                     |                |
|                                        | short                      | 0.5981          | 0.1996            |                |                     |                |
|                                        | long                       | 0.3532          | 0.2097            |                |                     |                |
| Calf age:prev. birth-interval (medium) |                            |                 |                   | 5.61           | 3,9183              | 0.0008         |
|                                        | first-born                 | -0.2062         | 0.07229           |                |                     |                |
|                                        | short                      | -0.3786         | 0.1013            |                |                     |                |
|                                        | long                       | -0.2054         | 0.09526           |                |                     |                |
| Birth cohort (1980)                    |                            |                 |                   | 2.86           | 5,9183              | 0.0138         |
|                                        | 1960                       | 0.07900         | 0.2241            |                |                     |                |
|                                        | 1970                       | 0.003297        | 0.1480            |                |                     |                |
|                                        | 1990                       | 0.1421          | 0.1260            |                |                     |                |
|                                        | 2000                       | -0.3903         | 0.1627            |                |                     |                |
|                                        | 2010                       | -0.4369         | 0.2270            |                |                     |                |
| Mother's death (alive)                 |                            | 2.0369          | 0.4230            | 23.19          | 1,9183              | <0.0001        |
| Calf age:Mother's death (alive)        |                            | -0.4704         | 0.1668            | 7.95           | 1,9183              | 0.0048         |
| Calf sex (F)                           |                            | 0.4366          | 0.2470            | 3.12           | 1,9183              | 0.0771         |
| Calf sex (F):Mother's death (alive)    |                            |                 |                   | 2.92           | 1,9183              | 0.0876         |
|                                        | M, mother dead             | 2.4734          | 0.5337            |                |                     |                |
|                                        | M, mother alive            | 0.01554         | 0.09558           |                |                     |                |
|                                        | F, Mother dead             | 1.6158          | 0.4415            |                |                     |                |
| Calf division (Sagaing)                |                            |                 |                   | 40.51          | 5,9183              | <0.0001        |
|                                        | Ayeyarwaddy group (see S1) | -0.4616         | 0.1781            |                |                     |                |
|                                        | Chin and Shan              | 0.8292          | 0.1807            |                |                     |                |
|                                        | Kachin                     | 1.6393          | 0.1828            |                |                     |                |
|                                        | Magway and Mandalay        | 0.2806          | 0.1304            |                |                     |                |
|                                        | Unknown                    | 2.1089          | 0.1882            |                |                     |                |
| Mother's age                           |                            | 0.01108         | 0.006420          | 2.98           | 1,9183              | 0.0844         |
| <b>Random effects</b>                  |                            | <b>Variance</b> | <b>Std. dev.</b>  |                |                     |                |
| Maternal ID                            |                            | 0.33            | 0.13              |                |                     |                |
